# Supplementary material
Source: HighWire-hosted journal article supplement (https://ajnr-sso.highwirestaging.com/highwire/filestream/104118/field_highwire_adjunct_files/0/0269.pdf)

**Online Supplemental Table 1. Study characteristics of 7 studies**

| Author            | Year | Region        | Period      | Total N | Design | NOS |
|-------------------|------|---------------|-------------|---------|--------|-----|
| Jajodia           | 2022 | India         | 2013 – 2016 | 84      | R      | 4   |
| Kumar             | 2022 | India         | 2017 – 2019 | 30      | P      | 4   |
| Elsholtz          | 2022 | Germany       | 2012 – 2020 | 150     | R      | 5   |
| Ashour            | 2021 | Egypt         | 2018 – 2020 | 69      | R      | 4   |
| Abdelrahman       | 2020 | Egypt         | 2018 – 2020 | 34      | R      | 4   |
| Wangaryattawanich | 2020 | United States | 2006 – 2018 | 128     | R      | 4   |
| Hsu               | 2019 | United States | 2014–2016   | 199     | R      | 5   |

P, prospective; R, retrospective; NOS, Newcastle-Ottawa Scale

Online Supplemental Table 2. Patient and imaging characteristics of 7 studies

| Author            | Sex<br>(M/F) | Age         | Tumor subsite                                                                                                                                         | Treatment<br>method                | Imaging<br>modality | CT device        |                                       | MRI device           |              | PET device                  |                                                    | Imaging period<br>from therapy<br>(month) | Reference standard |                | Evaluator                                                           |
|-------------------|--------------|-------------|-------------------------------------------------------------------------------------------------------------------------------------------------------|------------------------------------|---------------------|------------------|---------------------------------------|----------------------|--------------|-----------------------------|----------------------------------------------------|-------------------------------------------|--------------------|----------------|---------------------------------------------------------------------|
|                   |              |             |                                                                                                                                                       |                                    |                     | Vendor           | Model                                 | Vendor               | Model        | Vendor                      | Model                                              |                                           | Recurrence         | non-recurrence |                                                                     |
| Jajodia           | NR           | 59 (median) | Oral cavity                                                                                                                                           | Sur                                | CEMRI               | NA               | NA                                    | Siemens              | Avant 1.5T   | NA                          | NA                                                 | 3≥                                        | His or FU          | FU             | 1 head and neck radiologist<br>(20yr)                               |
| Kumar             | 28/2         | 49 (mean)   | Hypopharynx<br>Oropharynx<br>Larynx                                                                                                                   | CRT                                | CECT                | GE<br>Healthcare | NA                                    | LightSpeed<br>VCT 64 | NA           | NA                          | NA                                                 | 3≥                                        | His or FU          | FU or His      | 2 radiologists<br>(8, 17yr)                                         |
| Elsholtz          | 85/65        | 62 (median) | Oral cavity                                                                                                                                           | Sur ± CRT<br>Sur ± RT              | CEMRI<br>CECT       | NR               | NR                                    | NR                   | NR           | NR                          | NR                                                 | 1.5≥                                      | His or FU          | FU             | 2 head and neck radiologists<br>(6, 7yr)                            |
| Ashour            | 41/28        | 50.6 (mean) | Larynx<br>Oral cavity<br>Oropharynx<br>Hypopharynx<br>Sinonasal cavity<br>Skull base<br>Nasopharynx<br>Salivary glands                                | Sur ± RT<br>CRT<br>Sur ± CRT<br>RT | CEMRI               | NA               | NA                                    | Philips              | Infenia 1.5T | NA                          | NA                                                 | 2.5                                       | His or FU          | FU or His      | 1 neuroradiologist                                                  |
| Abdelrahman       | 27/7         | 54.5 (mean) | Oral cavity<br>Larynx                                                                                                                                 | NR                                 | CEMRI<br>CECT       | GE<br>Healthcare | Optima 660<br>128 Slice CT<br>Scanner | Philips              | Achieva 1.5T | NA                          | NA                                                 | 1.5≥                                      | His or FU          | FU or His      | 2 head and neck radiologists<br>(11, 15yr)                          |
| Wangaryattawanich | 97/31        | 59 (mean)   | Oropharynx<br>Oral cavity<br>Larynx<br>Hypopharynx<br>Nasopharynx<br>Unknown primary<br>Skin<br>Parotid glands<br>Oropharynx<br>Oral cavity<br>Larynx | Sur ± RT<br>CRT<br>Sur ± CRT<br>RT | PET/CT              | NA               | NA                                    | NA                   | NA           | GE<br>Healthcare<br>Siemens | Discovery<br>Emotion                               | 2–3≥                                      | His or FU          | FU             | 1 neuroradiologist                                                  |
| Hsu               | 141/58       | 63.4 (mean) | Hypopharynx<br>Nasopharynx<br>Unknown primary<br>Skin<br>Parotid glands                                                                               | CRT<br>Sur ± CRT<br>Sur + RT       | PET/CT<br>and CECT  | NA               | NA                                    | NA                   | NA           | GE<br>Healthcare            | Discovery<br>PET/CT 600<br>Discovery<br>PET/CT 690 | 3≥                                        | His or FU          | FU or His      | 1 of 4 dedicated head and<br>neck radiologists<br>(30, 15, 11, 9yr) |

NR, not report RT, radiotherapy; CRT, chemoradiotherapy; Sur, surgery; CE, contrast-enhanced; NA, not available; His, histology; FU, follow up

**Online Supplemental Table 3. Recurrence and non-recurrence lesions in each NI-RADS category in 7 studies (number)**

| Author            | Primary site NI-RADS 1 |                | Primary site NI-RADS 2 |                | Primary site NI-RADS 3 |                | Lymph nodes NI-RADS 1 |                | Lymph nodes NI-RADS 2 |                | Lymph nodes NI-RADS 3 |                |
|-------------------|------------------------|----------------|------------------------|----------------|------------------------|----------------|-----------------------|----------------|-----------------------|----------------|-----------------------|----------------|
|                   | Recurrence             | Non-recurrence | Recurrence             | Non-recurrence | Recurrence             | Non-recurrence | Recurrence            | Non-recurrence | Recurrence            | Non-recurrence | Recurrence            | Non-recurrence |
| Jajodia           | NA                     | NA             | 15                     | 18             | 46                     | 5              | NA                    | NA             | NA                    | NA             | NA                    | NA             |
| Kumar             | 0                      | 6              | 4                      | 12             | 6                      | 1              | NA                    | NA             | NA                    | NA             | NA                    | NA             |
| Elsholtz          | 7                      | 114            | 2                      | 0              | 10                     | 2              | 3                     | 110            | 1                     | 9              | 15                    | 1              |
| Ashour            | 1                      | 20             | 3                      | 15             | 22                     | 8              | NA                    | NA             | NA                    | NA             | NA                    | NA             |
| Abdelrahman       | NA                     | NA             | NA                     | NA             | NA                     | NA             | 0                     | 15             | 1                     | 4              | 7                     | 1              |
| Wangaryattawanich | NA                     | NA             | NA                     | NA             | 44                     | 35             | NA                    | NA             | NA                    | NA             | 34                    | 18             |
| Hsu               | 9                      | 245            | 7                      | 31             | 12                     | 10             | 11                    | 263            | 3                     | 17             | 7                     | 3              |

NA, not available

Online Supplemental Figure 1: Funnel plots of the results of proportional meta-analyses of the recurrence rates for each NI-RADS category

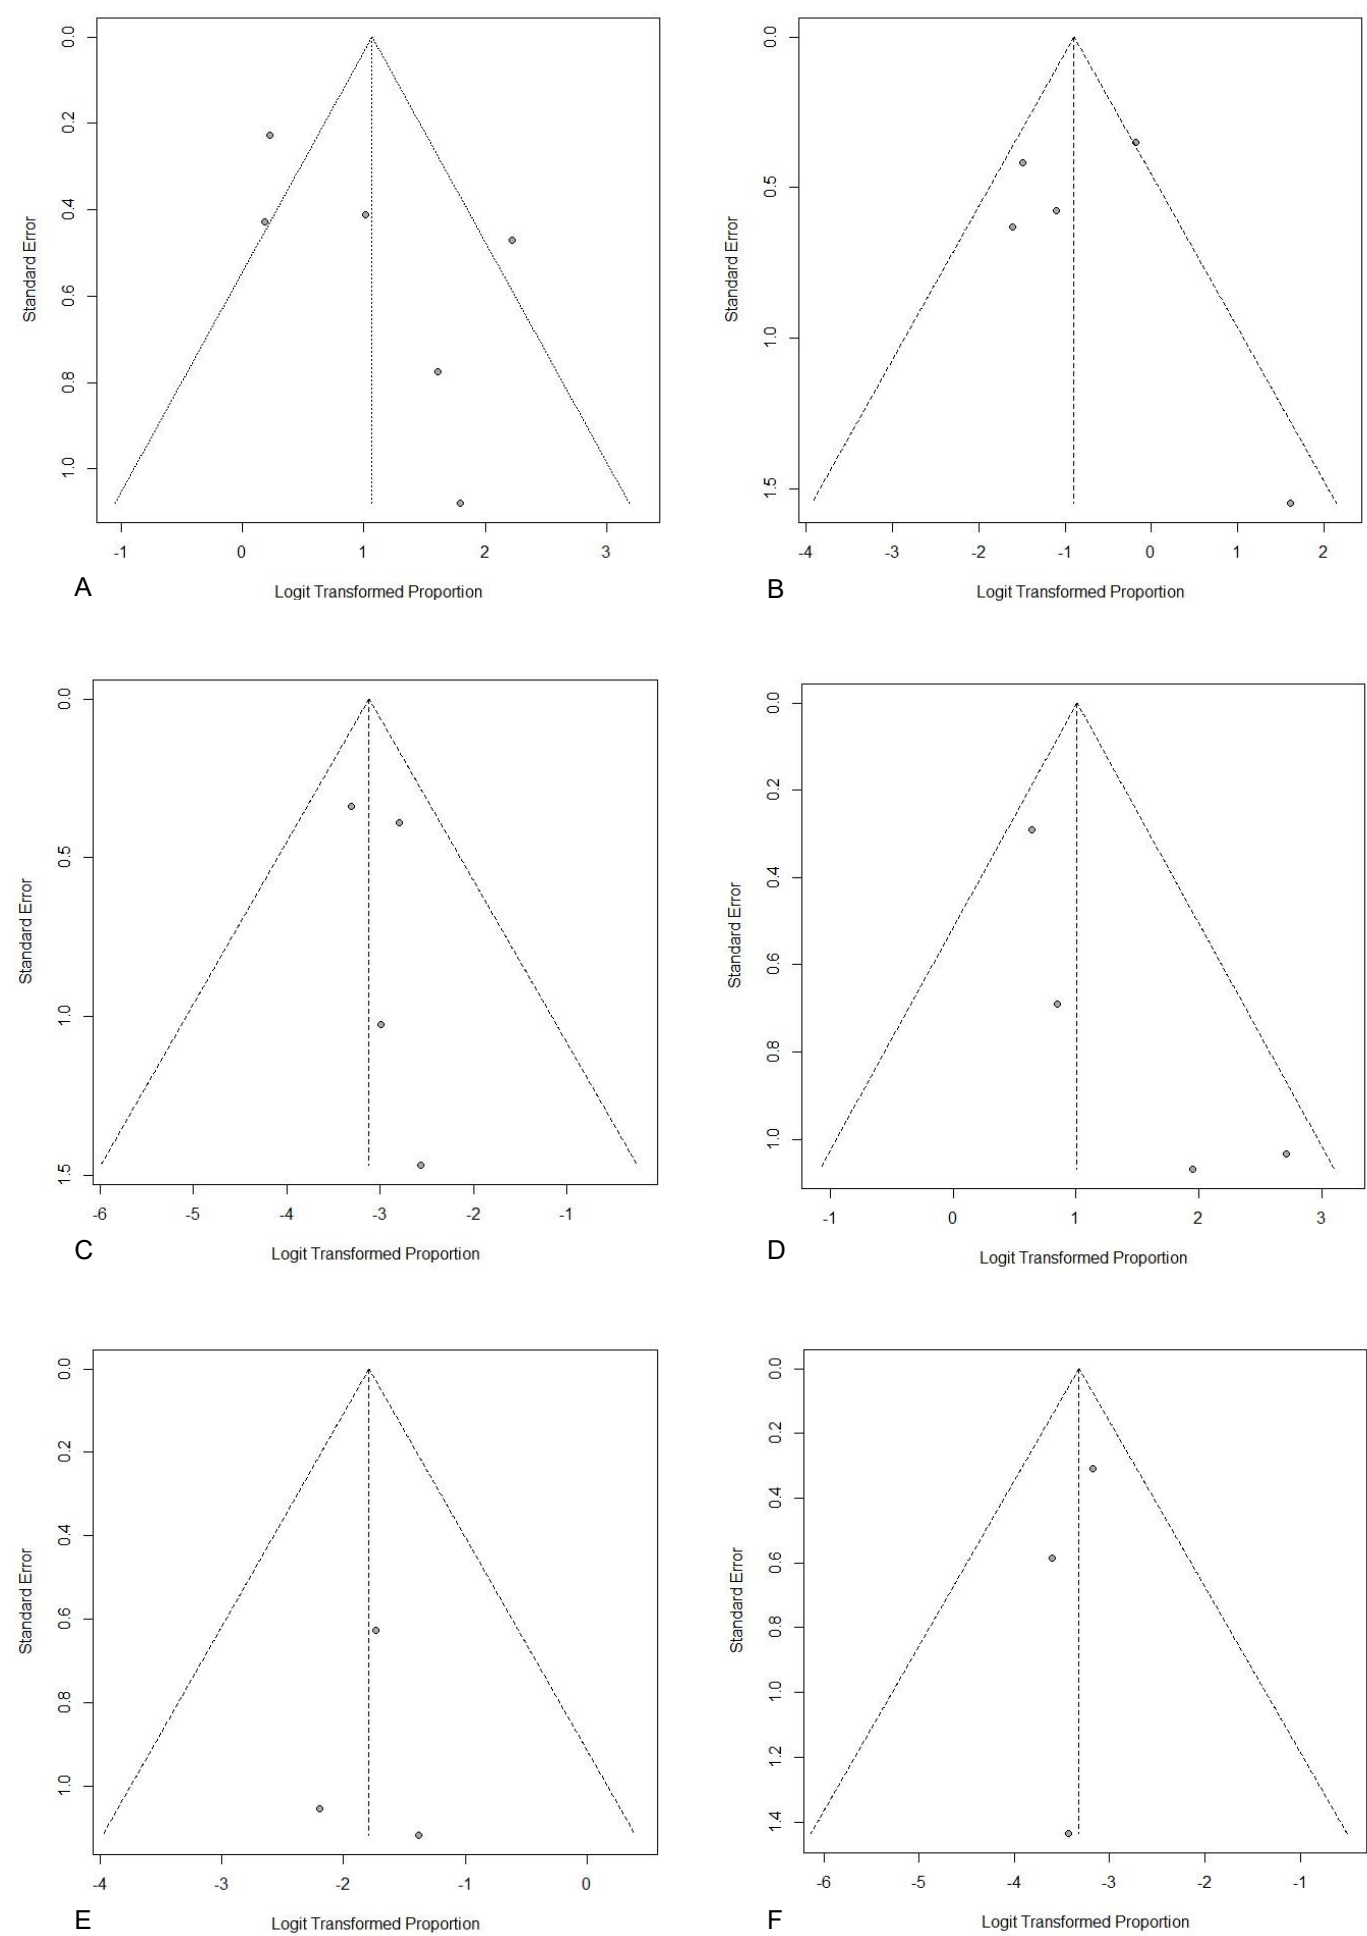

Online Supplemental Figure 2: Forest plot of the summary estimated sensitivity (A), specificity (B), and diagnostic odds ratio (C) in the primary site with NI-RADS3 as the cutoff

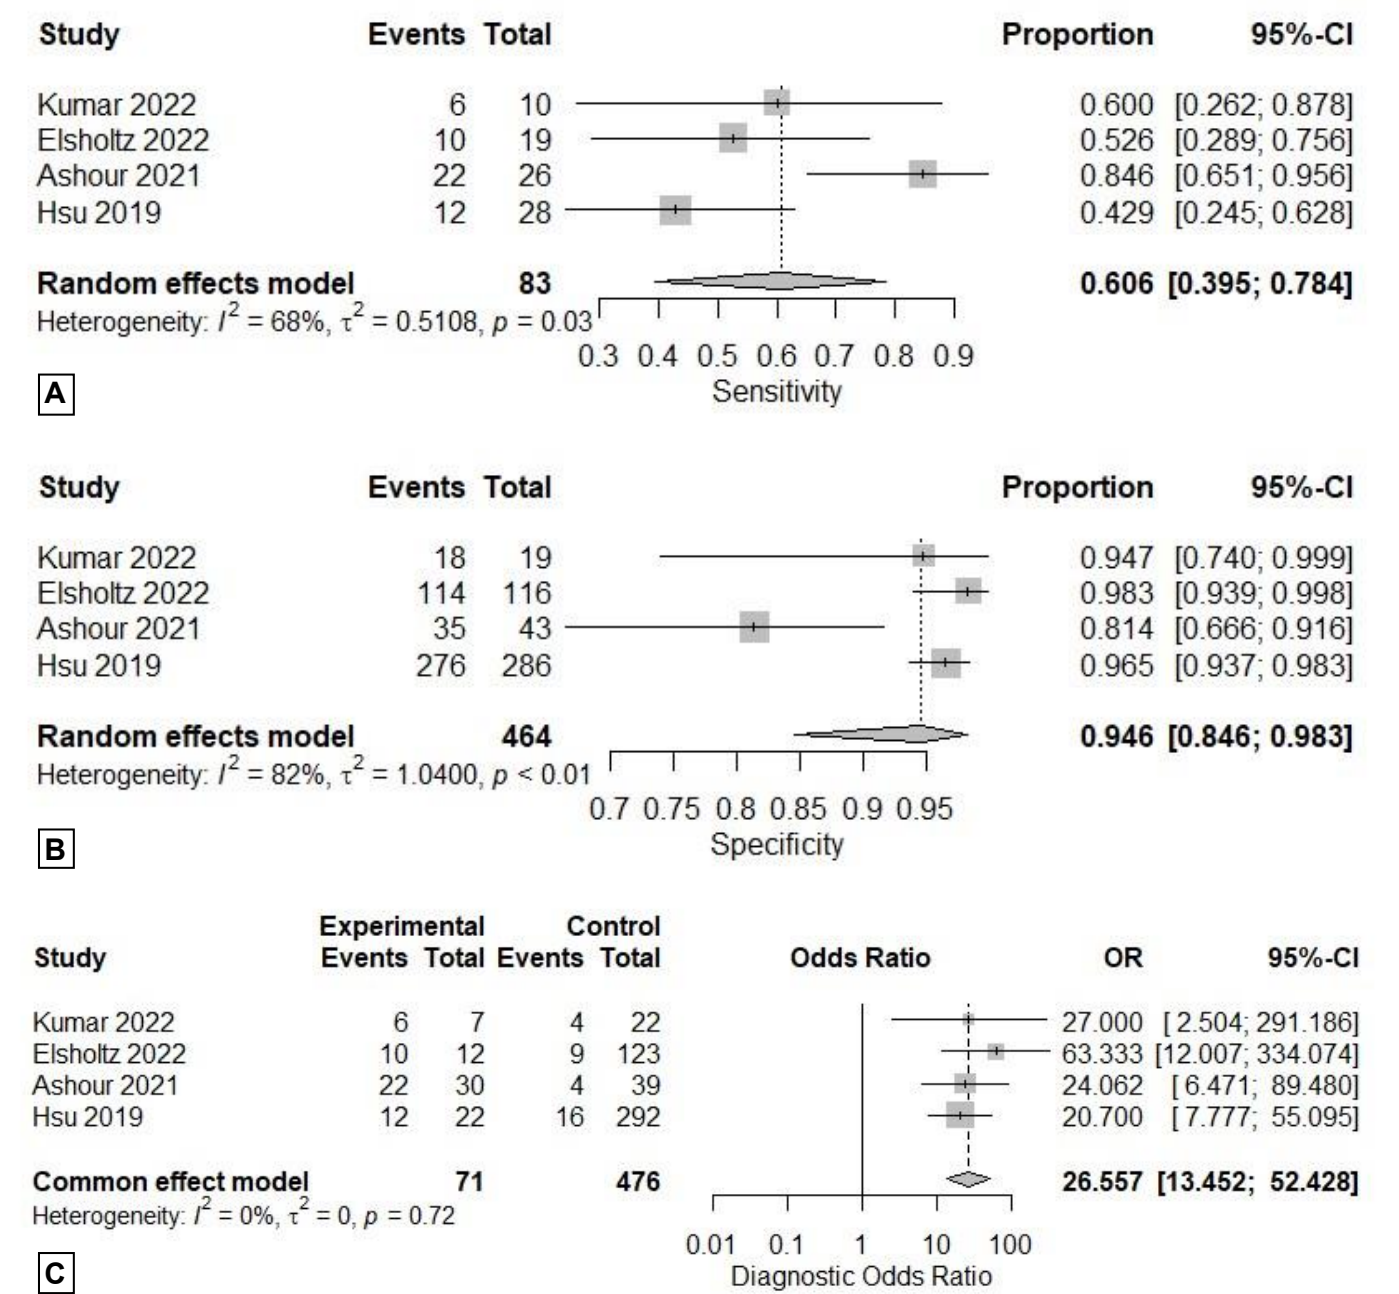

Online Supplemental Figure 3: Forest plot of the summary estimated sensitivity (A), specificity (B), and diagnostic odds ratio (C) in the primary site with NI-RADS2 as the cutoff

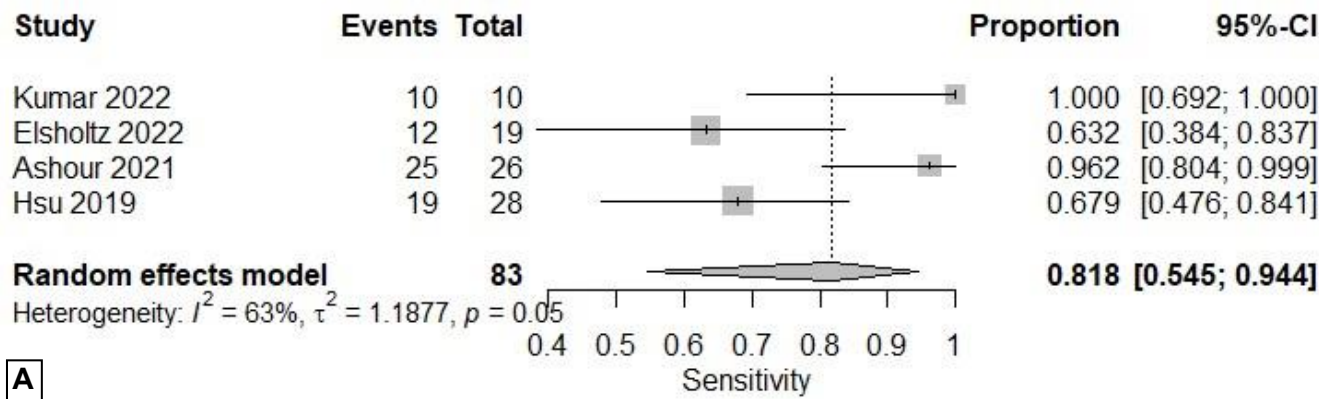

A

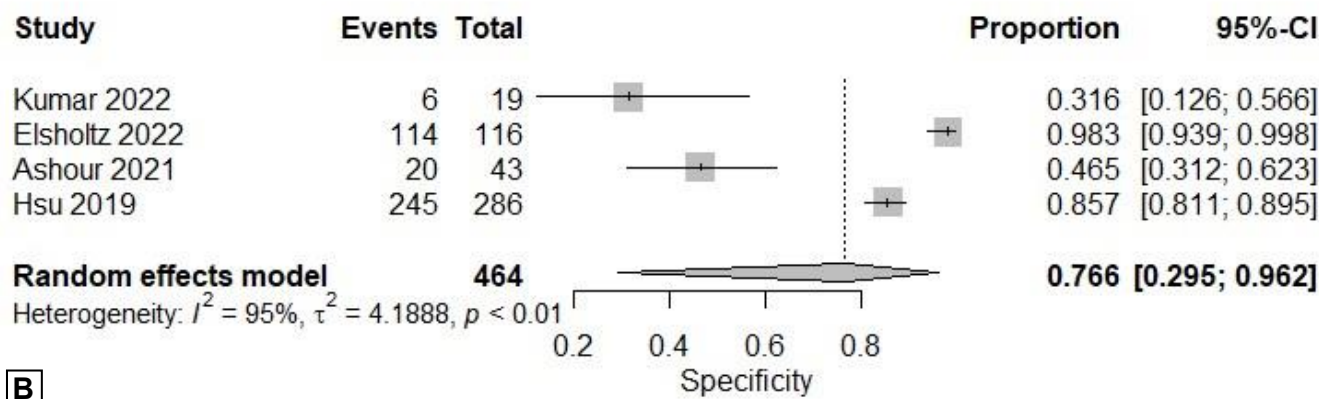

B

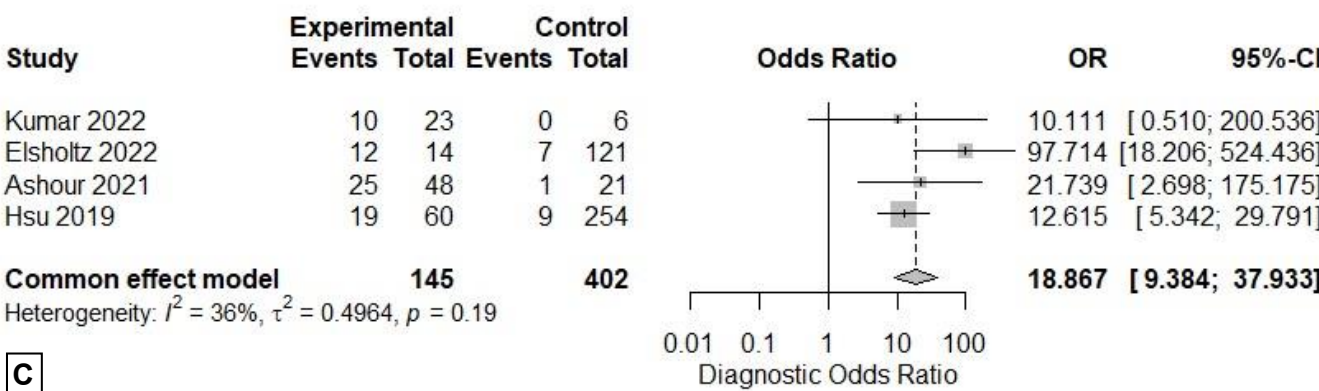

C

Online Supplemental Figure 4: Forest plot of the summary estimated sensitivity (A), specificity (B), and diagnostic odds ratio (C) in the lymph node with NI-RADS3 as the cutoff

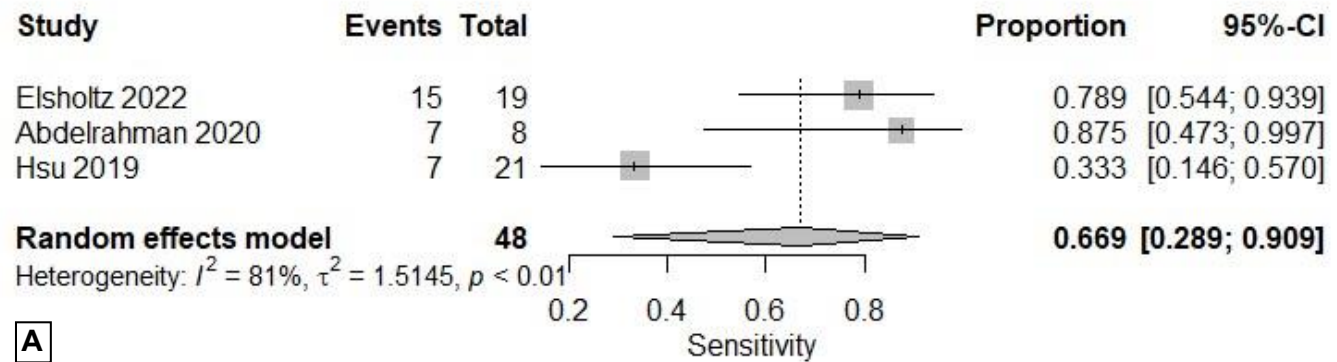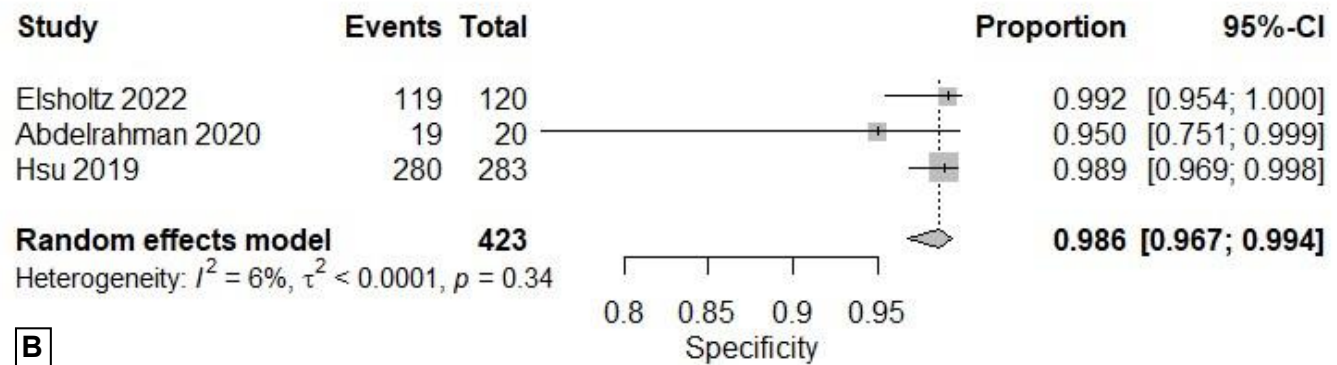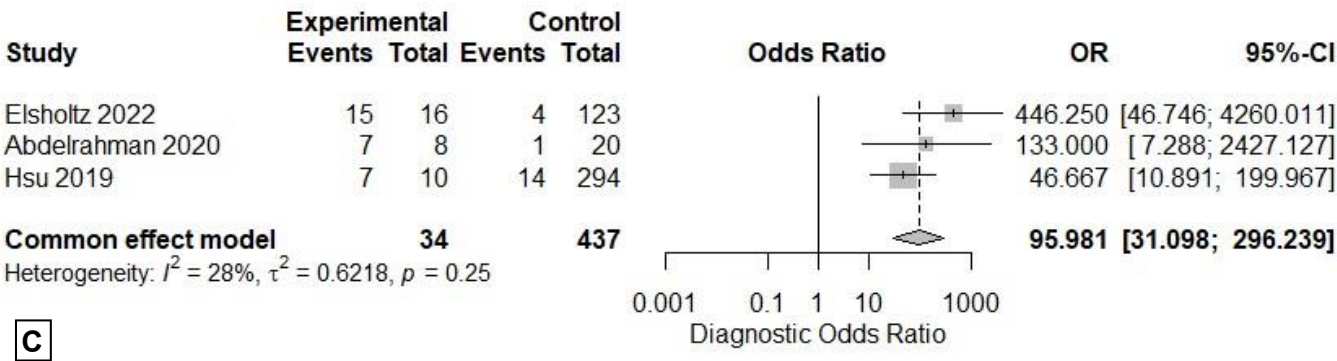



Online Supplemental Figure 5: Forest plot of the summary estimated sensitivity (A), specificity (B), and diagnostic odds ratio (C) in the lymph node with NI-RADS2 as the cutoff

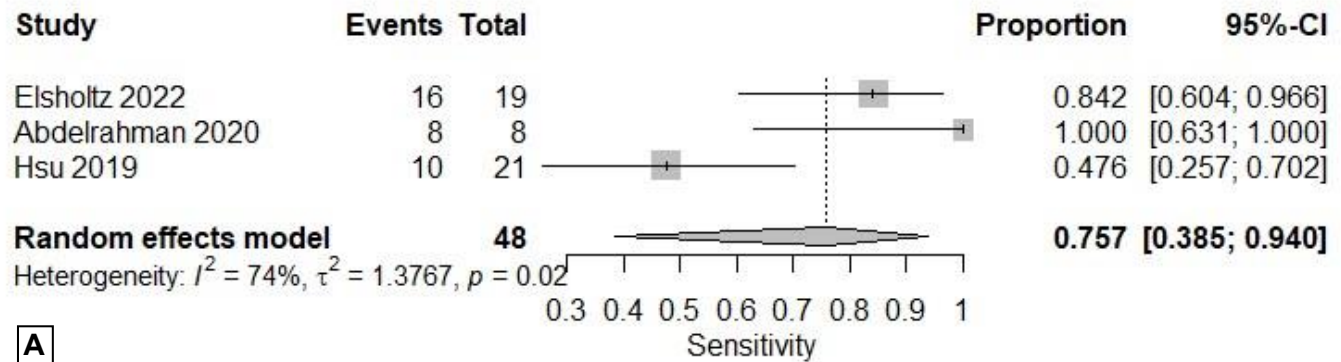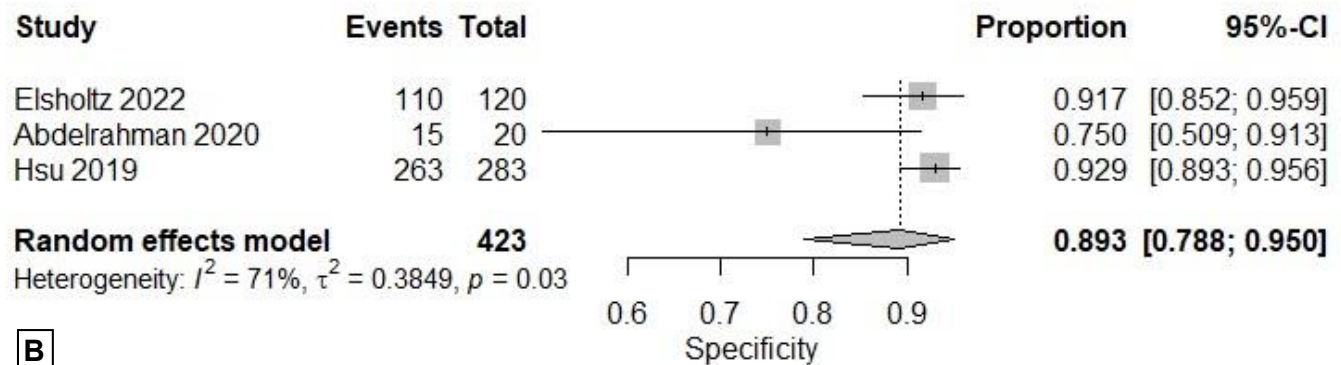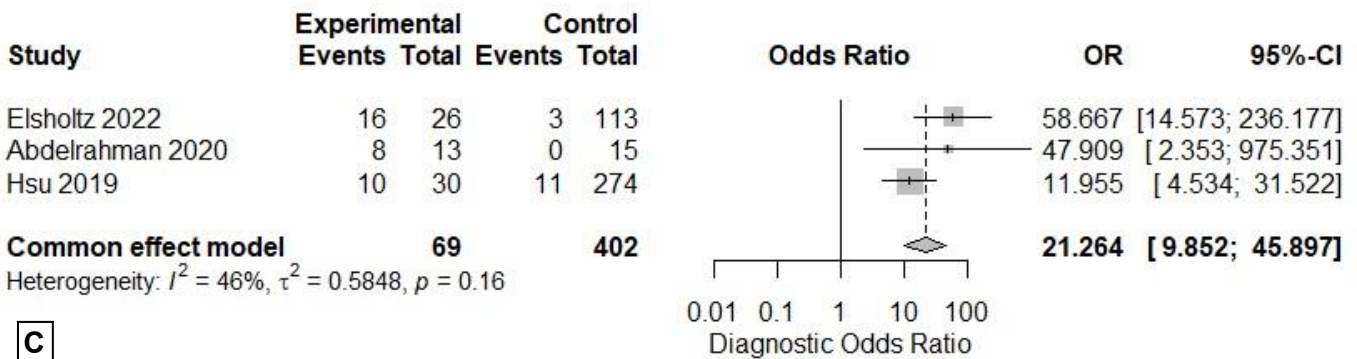

Supplement: 0269.pdf [file 0269.pdf]
